# Supplementary material
Source: publisher figshare collection journal article supplement (https://acs.figshare.com/ndownloader/files/22821026)
Supplement: Supplementary file 1 [file 22821026]

# Targeted Delivery of Notch Inhibitor Attenuates Obesity-Induced Glucose Intolerance and Liver Fibrosis

*Lauren R. Richter<sup>†‡\*\*</sup>, Qianfen Wan<sup>§\*\*</sup>, Di Wen<sup>||¶\*\*\*</sup>, Yuqi Zhang<sup>||#</sup>, Junjie Yu<sup>‡</sup>, Jin ku Kang<sup>‡</sup>,  
Changyu Zhu<sup>‡Δ</sup>, Elizabeth L. McKinnon<sup>††</sup>, Zhen Gu<sup>\*</sup><sup>||¶#</sup>, Li Qiang<sup>\*§</sup>, and Utpal B. Pajvani<sup>\*‡</sup>*

<sup>†</sup>Departments of Pediatrics, <sup>‡</sup>Medicine, and <sup>§</sup>Pathology and Cell Biology, Columbia University, New York, New York 10032, United States

<sup>||</sup>Department of Bioengineering, University of California, Los Angeles, California 90095, United States

<sup>¶</sup>California NanoSystems Institute, Jonsson Comprehensive Cancer Center and Center for Minimally Invasive Therapeutics, University of California, Los Angeles, California 90095, United States

<sup>#</sup>Joint Department of Biomedical Engineering, University of North Carolina at Chapel Hill and North Carolina State University, Raleigh, North Carolina 27695, United States

<sup>Δ</sup>Department of Cancer Biology and Genetics, Sloan Kettering Institute, Memorial Sloan Kettering Cancer Center, New York, NY 10065, United States

<sup>††</sup>Department of Pathology and Laboratory Medicine, University of British Columbia, Vancouver, British Columbia V6T 2B5, Canada

\*Address correspondence to [guzhen@g.ucla.edu](mailto:guzhen@g.ucla.edu) (Z.G.); [lq2123@columbia.edu](mailto:lq2123@columbia.edu) (L.Q.);  
[up2104@columbia.edu](mailto:up2104@columbia.edu) (U.B.P.).

Supporting Information for Publication

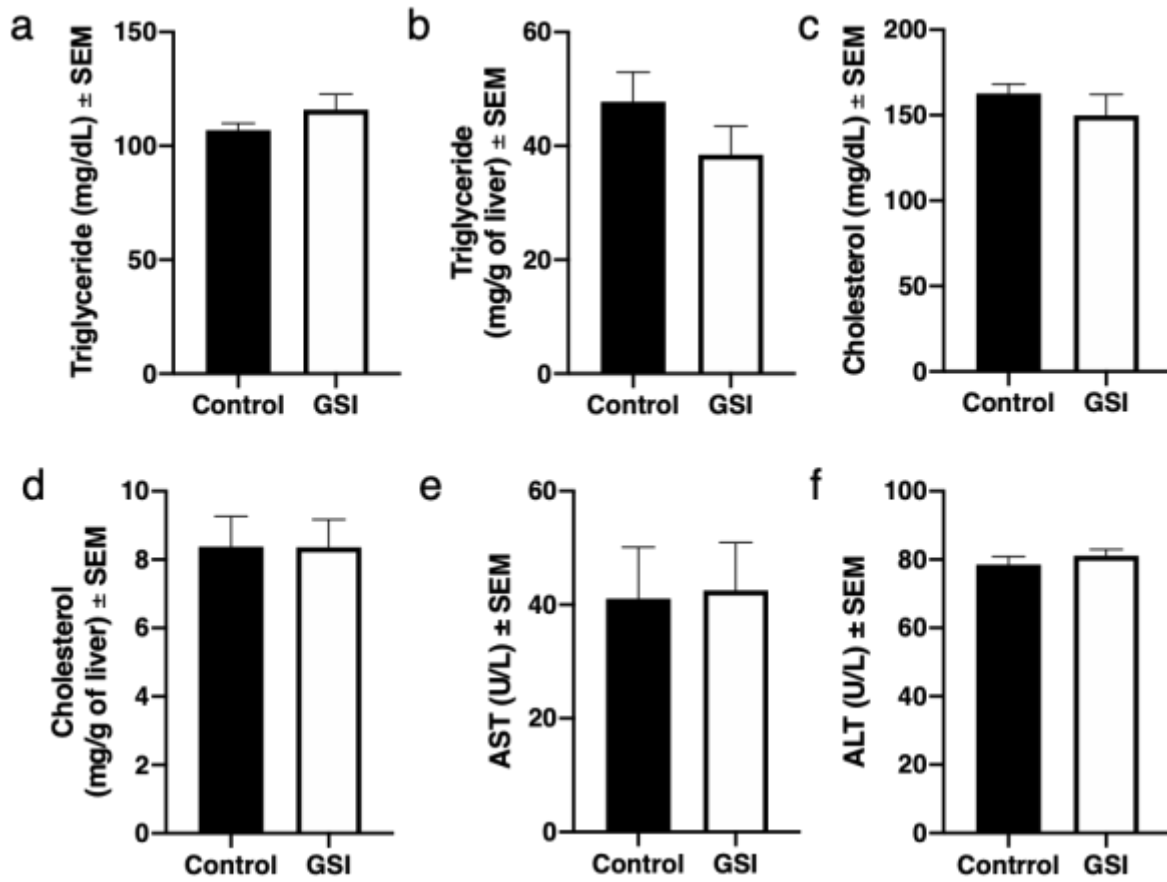

**Figure S1.** Serum and Liver Markers in GSI NP-Treated, HFD-Fed Mice. (a) Serum and (b) liver triglycerides, and (c) serum and (d) liver cholesterol were unchanged in HFD-fed mice treated with GSI NPs, as were (e, f) plasma transaminases. *n* = 11-12/group.

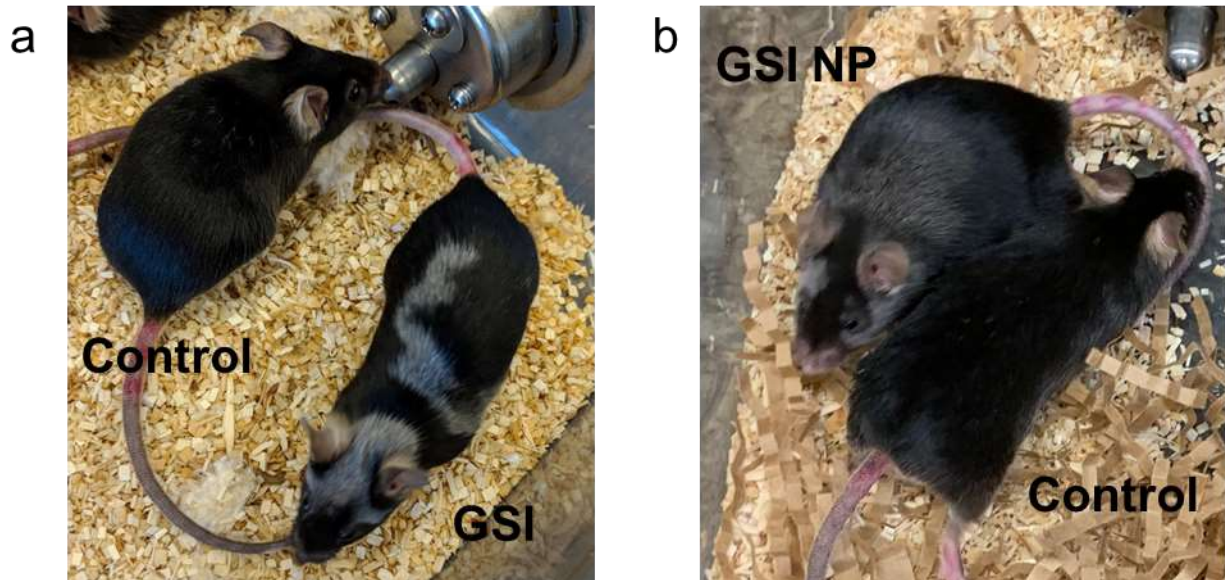

**Figure S2.** Comparison of Hair Graying in Systemic vs. GSI NP-Treated, HFD-Fed Mice. (a) After four weeks of q3 day intraperitoneal injection of unencapsulated GSI ( $\sim 2.5 \mu\text{g/kg/dose}$ ), hair graying was observed in all GSI-treated animals but not controls. (b) Hair graying was noted in 80% of IV-injected GSI NP-treated animals. Graying patterns varied amongst individuals between groups, representative pictures shown.  $n = 8-9, 11-12/\text{group}$ .

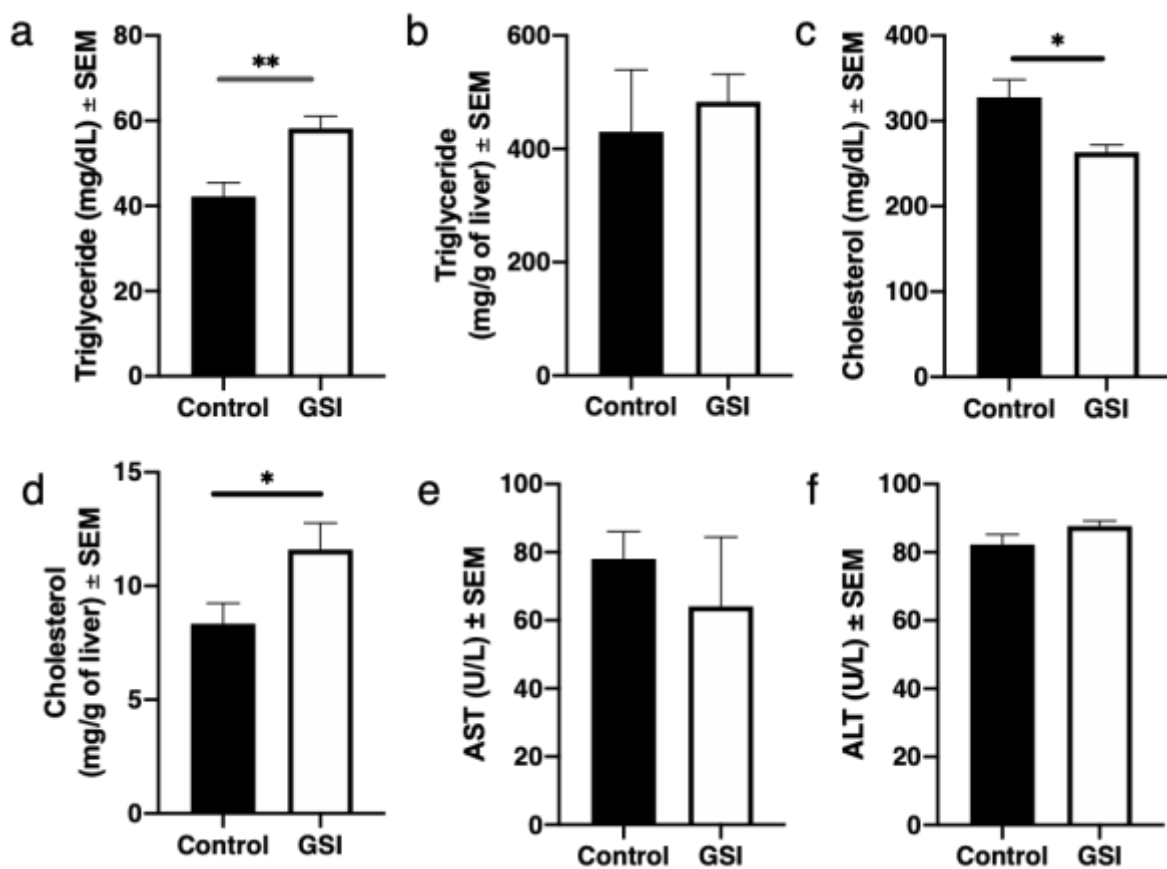

**Figure S3.** Serum and Liver Markers in GSI NP-Treated, NASH Diet-Fed Mice. (a) Serum and (b) liver triglycerides, (c) serum and (d) liver cholesterol and (e, f) plasma transaminases in NASH diet-fed mice treated with control or GSI NPs. \*  $p < 0.05$ , \*\*  $p < 0.01$ ,  $n = 6-9/\text{group}$ .
